# Supplementary material
Source: Springer Nature journal article supplement (https://www.springermedizin.de/resource/supplementary/12959_2013_228_MOESM4_ESM.pdf/9569242)
Supplement: MOESM4 [file 9569242]

# Activated Partial Thromboplastin Time

Effect of dabigatran and rivaroxaban (prophylactic dosages) in dependence of drug administration and reagent

## Dabigatran

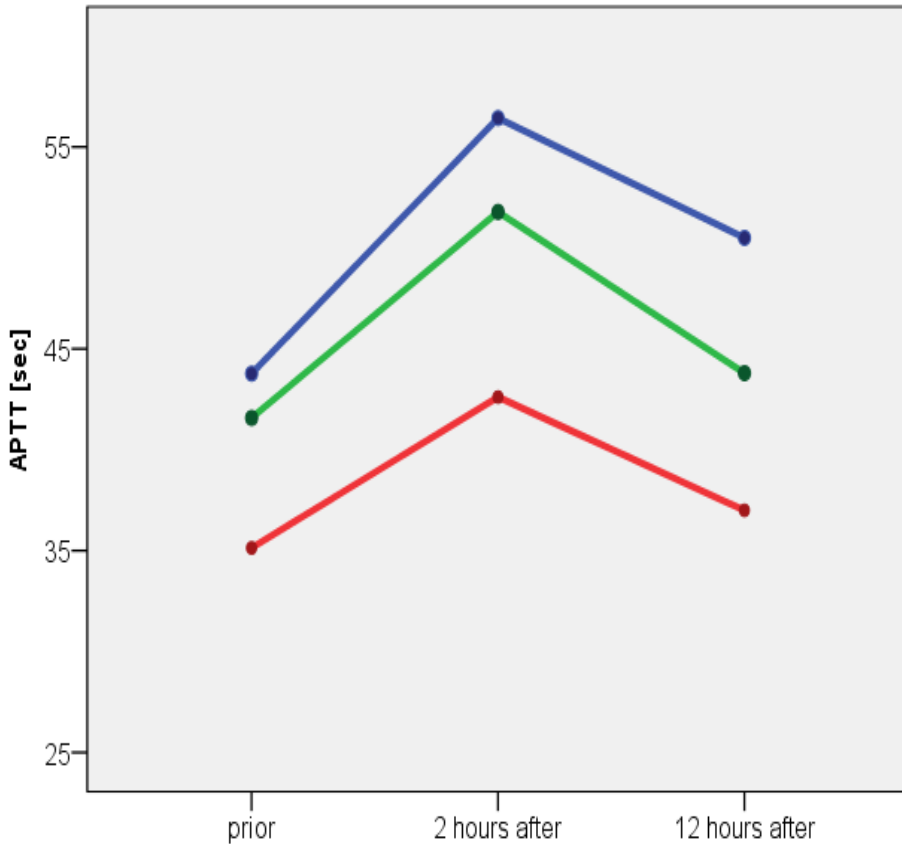

dabigatran 220 mg od administration

— STA APTT

— PAtrombin

— Synthasil

## Rivaroxaban

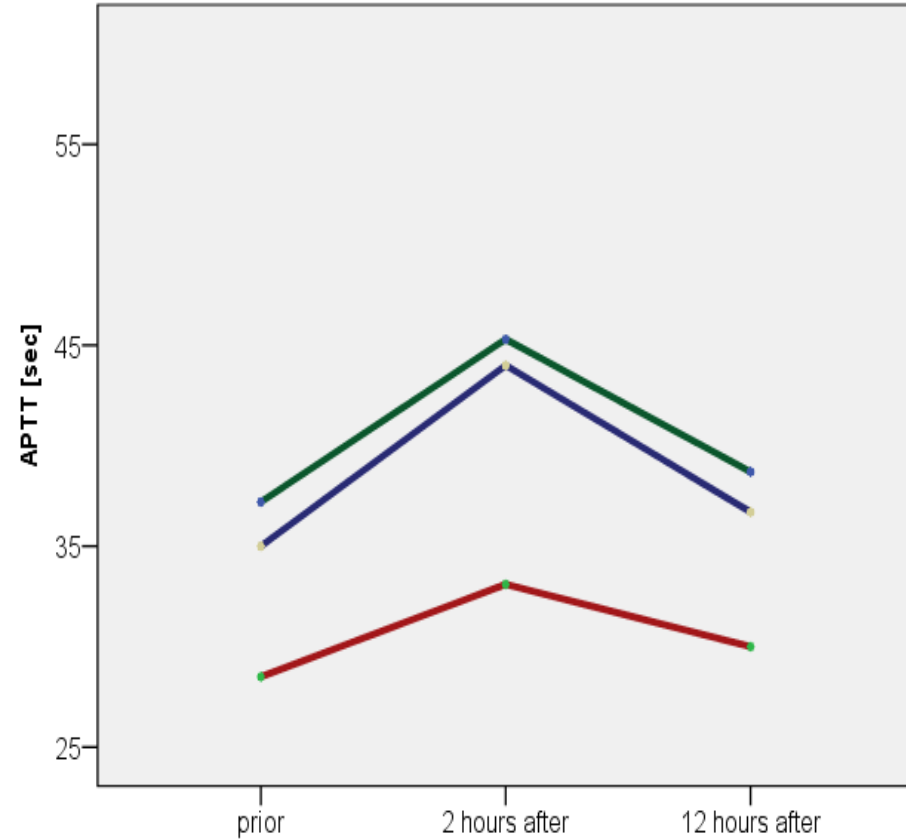

rivaroxaban 10 mg od administration
